# Supplementary material
Source: ML conference proceedings conference paper supplement (https://proceedings.mlr.press/v48/caragiannis16.html)
Supplement: Supplementary file 1 [file caragiannis16-supp.pdf]

## Appendix

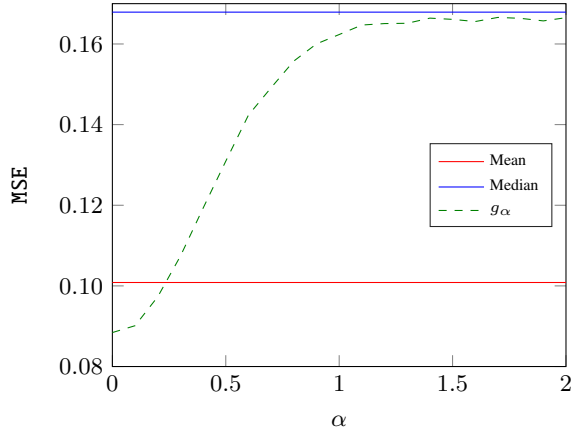

(a) The MSEs of the sample mean, the sample median, and  $g_\alpha$  as a function of  $|\alpha|$  (the distance of the phantom from the true mean) for the standard Gaussian and  $n = 8$ .

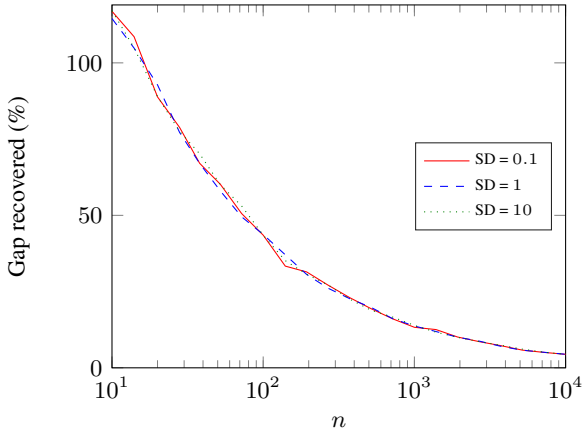

(b) The difference between the MSEs of the sample median and  $g_\alpha$  as a percentage of the difference between the MSEs of the sample median and the sample mean, when the underlying distribution is the standard Gaussian. To measure the best-case improvement, we set  $\alpha = 0$  (i.e., at the true mean).

Figure 3. Adding a single real-valued phantom when the number of samples  $n$  is even.

### A. Proof of Lemma 3.3

Fix a symmetric distribution  $D \in \mathcal{D}^{\text{sym}}$  with mean  $\mu$ , PDF  $f$ , and CDF  $F$ . Let  $g_t(x_1, \dots, x_n) = x_{(t)}$  denote the  $t^{\text{th}}$  order statistic. We want to prove  $\text{MSE}(g_t, D) \geq \text{MSE}(g_{t+1}, D)$  for  $t \leq (n-1)/2$ . The comparison between  $g_{n-t}$  and  $g_{n-t+1}$  follows from symmetry of  $D$ .

We prove this by considering each “negative” example where the squared error of  $g_t$  is less than the squared error of  $g_{t+1}$  by an amount  $d$ , and map it to a unique “positive” example where the squared error of  $g_{t+1}$  is less than the squared error of  $g_t$  by  $d$ . The result follows by ensuring

that the negative example has at most as much probability density as its corresponding positive example. There are two cases of negative examples.

*Case 1:*  $x_{(t)} = \mu + a$  and  $x_{(t+1)} = \mu + b$ , where  $0 \leq a < b$ . The squared error of  $g_t$  is  $d = b^2 - a^2$  less than that of  $g_{t+1}$ . Let us map it to the positive example where  $x_{(t)} = \mu - b$  and  $x_{(t+1)} = \mu - a$ . In this (unique) positive example, the squared error of  $g_{t+1}$  is exactly  $b^2 - a^2$  less than that of  $g_t$ . Let  $f_N$  and  $f_P$  denote the probability densities of the negative and the positive examples. We need to show  $f_N \leq f_P$ . Now,  $f_P/f_N$  is

$$\begin{aligned} & \frac{f(\mu - a)f(\mu - b) [F(\mu - b)]^{t-1} [1 - F(\mu - a)]^{n-t-1}}{f(\mu + a)f(\mu + b) [F(\mu + a)]^{t-1} [1 - F(\mu + b)]^{n-t-1}} \\ &= \left( \frac{F(\mu + a)}{F(\mu - b)} \right)^{n-2t} \geq 1, \end{aligned}$$

where the first transition holds due to symmetry of  $D$  around  $\mu$ , and the final transition holds because  $F(\mu - b) \leq 1/2 \leq F(\mu + a)$  and  $n - 2t > 0$ .

*Case 2:*  $x_{(t)} = \mu - a$  and  $x_{(t+1)} = \mu + b$ , where  $0 \leq a < b$ . Here,  $x_{(t)}$  and  $x_{(t+1)}$  are on different sides of  $\mu$ . We map it to the (unique) positive example where  $x_{(t)} = \mu - b$  and  $x_{(t+1)} = \mu + a$ , thus maintaining them on different sides. Both examples admit an identical difference of  $b^2 - a^2$  between the squared errors, and the ratio  $f_P/f_N$  is

$$\begin{aligned} & \frac{f(\mu + a)f(\mu - b) [F(\mu - b)]^{t-1} [1 - F(\mu + a)]^{n-t-1}}{f(\mu - a)f(\mu + b) [F(\mu - a)]^{t-1} [1 - F(\mu + b)]^{n-t-1}} \\ &= \left( \frac{F(\mu - a)}{F(\mu - b)} \right)^{n-2t} \geq 1. \end{aligned}$$

For the final inequality, note that we still have  $F(\mu - b) \leq F(\mu - a)$  because  $b > a \geq 0$ . ■

### B. Proof of Proposition 3.4

Fix  $\alpha \in \mathbb{R}$ . First, observe that  $g_\alpha$  is the generalized median obtained by placing one phantom on  $\alpha$ , and an equal number of phantoms on  $-\infty$  and  $\infty$ . The following alternative formulation of  $g_\alpha$  provides further intuition.

$$g_\alpha(\mathbf{x}) = \begin{cases} x_{(n/2)} & \text{if } \alpha \leq x_{(n/2)}, \\ \alpha & \text{if } x_{(n/2)} \leq \alpha \leq x_{(n/2+1)}, \\ x_{(n/2+1)} & \text{if } x_{(n/2+1)} \leq \alpha. \end{cases}$$

Thus,  $g_\alpha$  always chooses among the left median, the right median, and  $\alpha$ . Fix a distribution  $D \in \mathcal{D}^{\text{sym}}$  with mean  $\mu$ .

Let  $\text{med}_\ell(\mathbf{x}) = x_{(n/2)}$  and  $\text{med}_r(\mathbf{x}) = x_{(n/2+1)}$  denote the left and the right medians. We show that  $\text{MSE}(g_\alpha, D) \leq \text{MSE}(\text{med}_\ell, D) = \text{MSE}(\text{med}_r, D)$ . Comparison with other order statistics then follows immediately from Lemma 3.3.

Note that  $\text{MSE}(\text{med}_\ell, D) = \text{MSE}(\text{med}_r, D)$  holds due to the symmetry of  $D$ .

Suppose  $\mu \geq \alpha$ . Observe that  $g_\alpha(\mathbf{x}) \neq \text{med}_\ell(\mathbf{x})$  implies  $\text{med}_\ell(\mathbf{x}) \leq g_\alpha(\mathbf{x}) < \alpha \leq \mu$ , and in that case  $g_\alpha(\mathbf{x})$  is closer to  $\mu$  than  $\text{med}_\ell(\mathbf{x})$ . This yields  $\text{MSE}(g_\alpha, D) \leq \text{MSE}(\text{med}_\ell, D)$ . For  $\mu \leq \alpha$ , a similar argument establishes  $\text{MSE}(g_\alpha, D) \leq \text{MSE}(\text{med}_r, D)$ . The proof now follows from the fact that  $\text{MSE}(\text{med}_\ell, D) = \text{MSE}(\text{med}_r, D)$  for any symmetric distribution  $D$ . ■
